# Supplementary material for: Dietary L-Tryptophan consumption determines the number of colonic regulatory T cells and susceptibility to colitis via GPR15
Source: PubMed Central journal article supplement (PMC10645889; doi:10.1038/s41467-023-43211-4), 2023-11-14
Supplement: 41467_2023_43211_MOESM1_ESM.pdf [file 41467_2023_43211_MOESM1_ESM.pdf]

# **Dietary L-Tryptophan consumption determines the number of colonic regulatory T cells and susceptibility to colitis via GPR15**

**Authors:** Nguyen T. Van,<sup>1,2,11</sup> Karen Zhang,<sup>1,2,11</sup> Rachel M. Wigmore,<sup>1,2</sup> Anne I. Kennedy,<sup>1,2</sup> Carolina R. DaSilva,<sup>1,2</sup> Jialing Huang,<sup>3,12</sup> Manju Ambelil,<sup>3</sup> Jose H. Villagomez,<sup>1,2</sup> Gerald J. O'Connor,<sup>1,2</sup> Randy S. Longman,<sup>4</sup> Miao Cao,<sup>5</sup> Adam E. Snook,<sup>1,2,5</sup> Michael Platten,<sup>6,7,8</sup> Gerard Kasenty,<sup>9</sup> Luis J. Sigal,<sup>1,2</sup> George C. Prendergast,<sup>3,10</sup> and Sangwon V. Kim<sup>1,2,\*</sup>

## **Affiliations:**

<sup>1</sup> Department of Microbiology and Immunology, Sidney Kimmel Medical College, Thomas Jefferson University, Philadelphia, PA, USA.

<sup>2</sup> Sidney Kimmel Cancer Center, Jefferson Health, Philadelphia, PA, USA.

<sup>3</sup> Department of Pathology, Anatomy, & Cell Biology, Sidney Kimmel Medical College, Thomas Jefferson University, Philadelphia, PA, USA

<sup>4</sup> Jill Roberts Center for IBD, Weill Cornell Medicine, New York, NY, USA.

<sup>5</sup> Department of Pharmacology, Physiology, & Cancer Biology, Sidney Kimmel Medical College, Thomas Jefferson University, Philadelphia, PA, USA

<sup>6</sup> CCU Neuroimmunology and Brain Tumor Immunology, German Cancer Research Center, Heidelberg, Germany

<sup>7</sup> Department of Neurology, Medical Faculty Mannheim, MCTN, Heidelberg University, Heidelberg, Germany

<sup>8</sup> DKFZ Hector Cancer Institute at the University Medical Center Mannheim, Mannheim, Germany

<sup>9</sup> Department of Genetics and Development, Irving Medical Center, Columbia University, NY, USA

<sup>10</sup> Lankenau Institute of Medical Research, Wynnewood, PA, USA

<sup>11</sup> These authors contributed equally

<sup>12</sup> Present address: Anatomic Pathology, Geisinger Medical Center, Danville, PA, USA

\*Corresponding author. Email: [svkim@jefferson.edu](mailto:svkim@jefferson.edu)

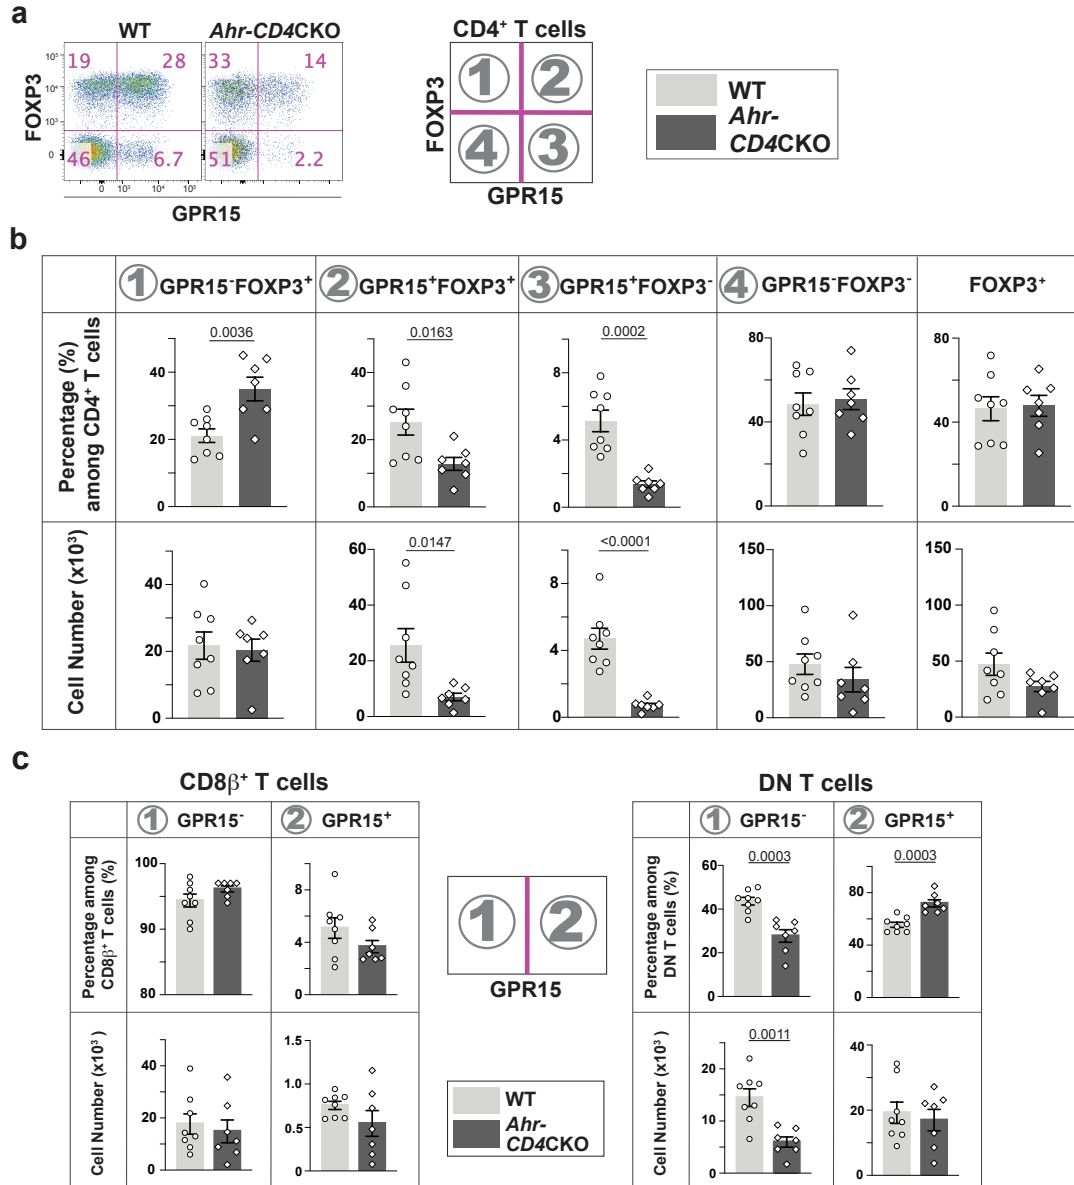

**Supplementary Fig. 1 AhR is required for GPR15 expression in CD4<sup>+</sup> T cells, but not in CD8 $\beta$ <sup>+</sup> or CD4<sup>-</sup>CD8 $\beta$ <sup>-</sup> (DN) T cells.** **a-b.** GPR15 and FOXP3 protein expression in CD4<sup>+</sup> T cells in the large intestine lamina propria (LILP) at steady state. Wild-type mice (WT: *Ahr*<sup>f/f</sup>, n=8) and T cell-specific *Ahr*-deficient mice (*Ahr-CD4CKO*: *CD4*<sup>Cre</sup>*Ahr*<sup>f/f</sup>, n=7) were used. Representative flow cytometry data, the percentage among CD4<sup>+</sup> T cells, and the total cell number of each population were shown. Representative of three independent experiments. **c.** CD8 $\beta$ <sup>+</sup> T cells and DN T cells in the LILP at a steady state were analyzed for GPR15 expression in the presence (*Ahr*<sup>f/f</sup>; n=8) or absence of AhR (*CD4*<sup>Cre</sup>*Ahr*<sup>f/f</sup>; n=7). Representative of at least three independent experiments. 8-14-week-old mice in C57BL/6 background were used (**a-c**). Data are presented as mean values  $\pm$  SEM (**b-c**). Each data point represents the result from one mouse, and p values were calculated by two-sided student's t-test (**b-c**). Source data are provided as a Source Data file (**b-c**).

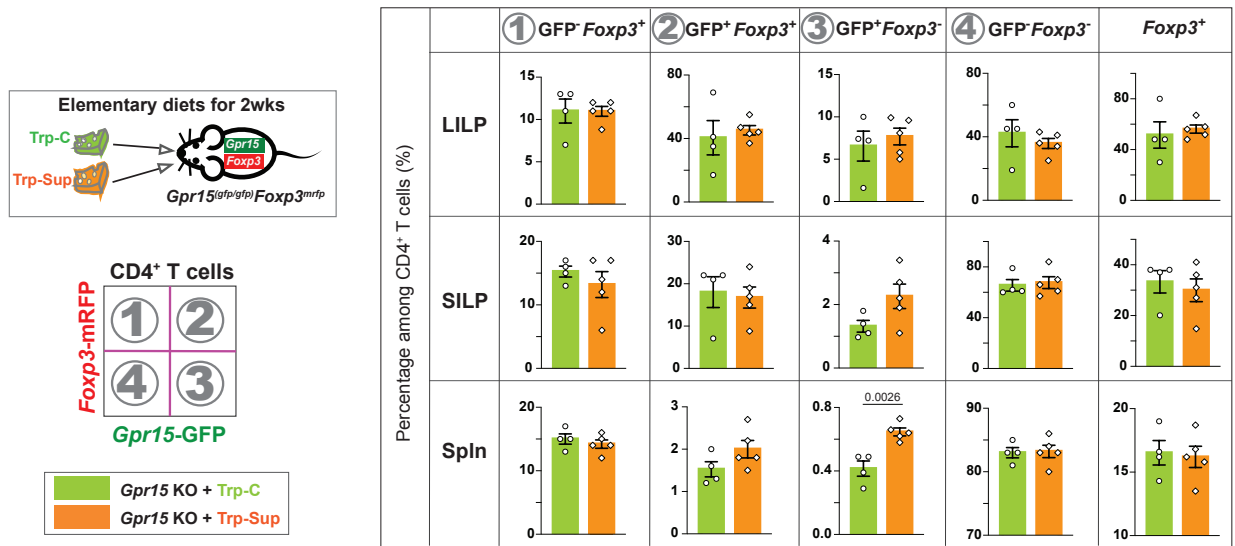

**Supplementary Fig. 2 Dietary supplementation of L-Tryptophan increases GPR15<sup>+</sup>CD4<sup>+</sup> T cells and their subsequent migration to the LILP.**

8-12-week-old *Gpr15<sup>(gfp/gfp)</sup>Foxp3<sup>mrfp</sup>* mice with TJU microbiota in C57BL/6 background were treated with Trp-C or Trp-Sup elementary diets for two weeks, and GPR15 wannabe (*GFP<sup>+</sup>*) cells and their FOXP3 expression were examined (SILP: small intestine lamina propria; Spln: spleen). The number of mice used: 4 for Trp-C and 5 for Trp-Sup. Data are presented as mean values +/- SEM. Each data point represents the result from one mouse, and p values were calculated by two-sided student's t-test. Source data are provided as a Source Data file.

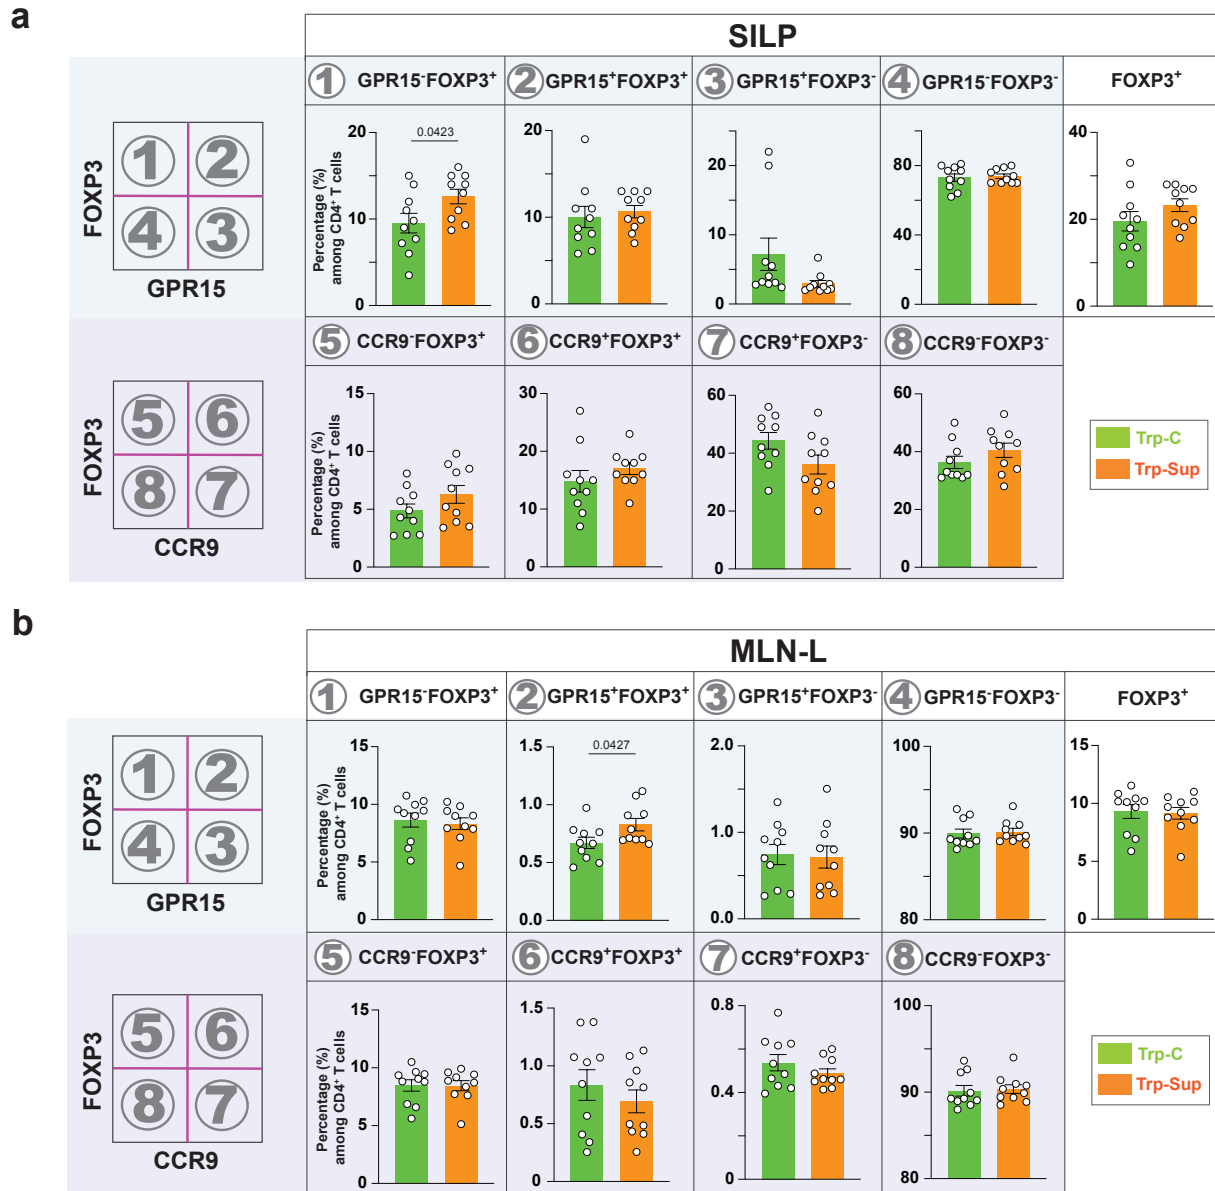

**Supplementary Fig. 3 L-Trp supplementation increases GPR15<sup>+</sup> Tregs in the lymph nodes draining the large intestine and does not induce CCR9 expression.**

**a-b.** GPR15 (in the light blue shade), CCR9 (in the light purple shade), and FOXP3 expression in CD4<sup>+</sup> T cells in the SILP (**a**) and MLNs-draining the proximal and mid-colon (MLN-L) (**b**). Trp-C (n=10), Trp-Sup (n=10). Combined results of two independent experiments (**a-b**). 8-12-week-old wild-type mice in C57BL/6 background were used (**a-b**). Data are presented as mean values +/- SEM (**a-b**). Each data point represents the result from one mouse, and p values were calculated by two-sided student's t-test(**a-b**). Source data are provided as a Source Data file (**a-b**).

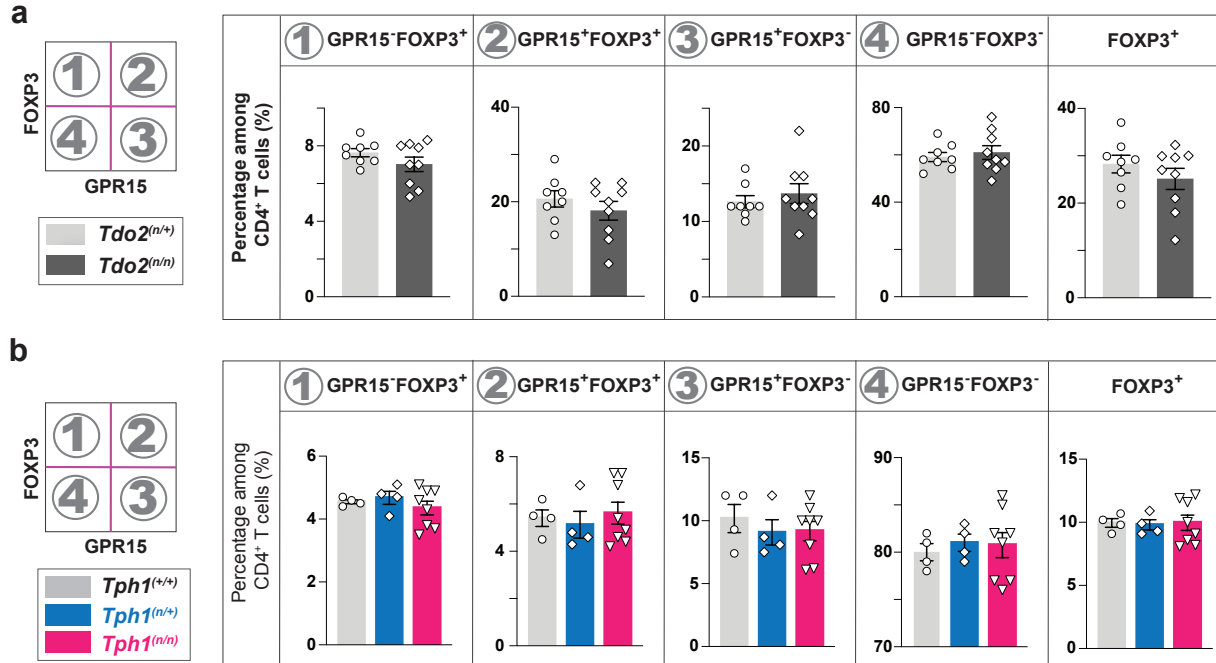

**Supplementary Fig. 4 GPR15 expression in CD4<sup>+</sup> T cells in the large intestine is independent of host enzyme TDO and TPH1.**

**a.** *Tdo2*<sup>(n/+)</sup> and *Tdo2*<sup>(n/n)</sup> mice were analyzed for GPR15 and FOXP3 expression among CD4<sup>+</sup> T cells in the LILP at a steady state. Number of mice used: 8 for *Tdo2*<sup>(n/+)</sup>, and 9 for *Tdo2*<sup>(n/n)</sup>. **b.** *Tph1*<sup>(+/+)</sup>, *Tph1*<sup>(n/+)</sup>, and *Tph1*<sup>(n/n)</sup> mice were analyzed for GPR15 and FOXP3 expression among CD4<sup>+</sup> T cells in the LILP at a steady state. Number of mice used: 4 for *Tph1*<sup>(+/+)</sup>, 4 for *Tph1*<sup>(n/+)</sup> (n=4) and 8 for *Tph1*<sup>(n/n)</sup>. Combined results of two independent experiments (**a-b**). 8-14-week-old mice in C57BL/6 background were used (**a-b**). Data are presented as mean values +/- SEM (**a-b**). Each data point represents the result from one mouse, and p values were calculated by two-sided student's t-test (**a-b**). Source data are provided as a Source Data file (**a-b**).

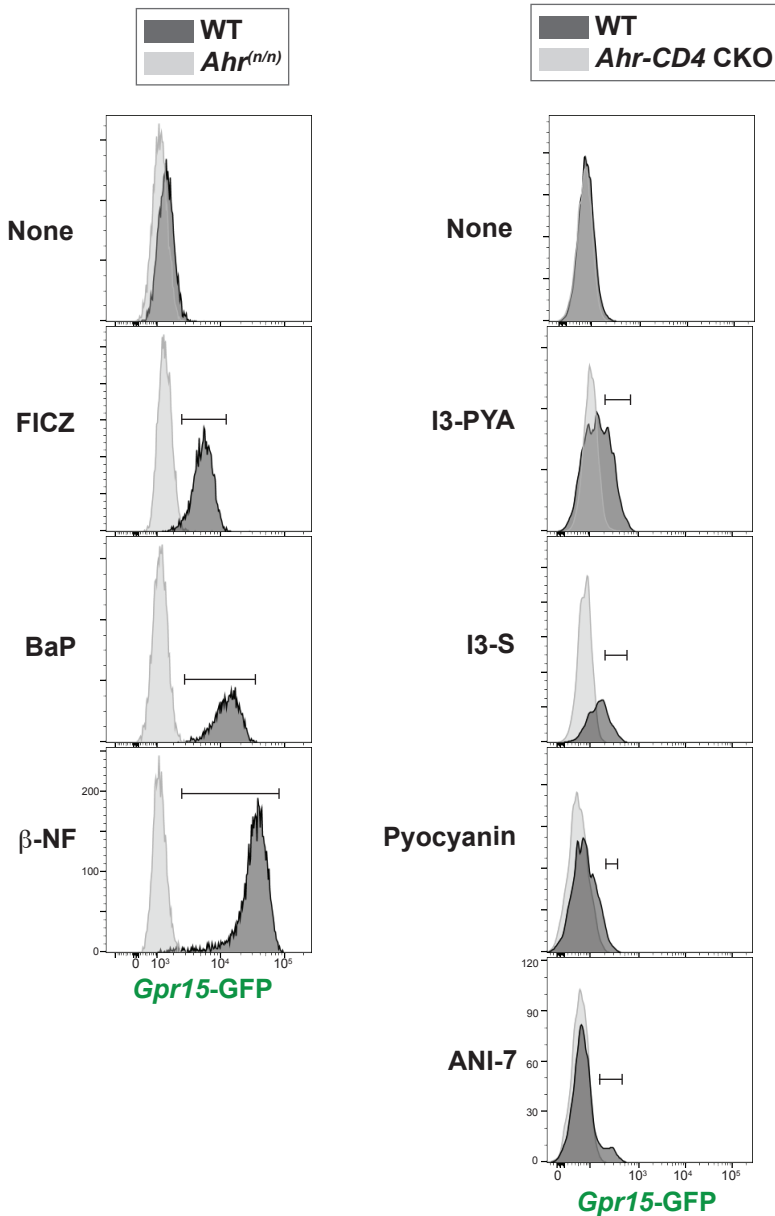

**Supplementary Fig. 5 Seven selected chemical compounds induce *Gpr15*-GFP expression through AhR.** CD4<sup>+</sup> naïve T cells (CD62L<sup>hi</sup>CD44<sup>lo</sup>mRFP<sup>-</sup>CD25<sup>-</sup>GFP<sup>+</sup>CD4<sup>+</sup>) from 8-14-week-old wild-type (*Ahr*<sup>fl/fl</sup>*Gpr15*<sup>gfp/+</sup>*Foxp3*<sup>mrfp</sup>), or *Ahr* KO (*Ahr*<sup>n/n</sup>*Gpr15*<sup>gfp/+</sup>*Foxp3*<sup>mrfp</sup>), or *Ahr-CD4CKO* (*Cd4*<sup>Cre</sup>*Ahr*<sup>fl/fl</sup>*Gpr15*<sup>gfp/+</sup>*Foxp3*<sup>mrfp</sup>) mice in C57BL/6 background were stimulated with anti-CD3ε and anti-CD28 antibody for 2-3 days with or without hTGFβ1 (0-3 ng/ml) and the selected chemical compounds in Fig. 4A. The following concentration ranges of the compounds were used: I3-PYA (100-300 μM), I3-S (1-3 μM), Pyocyanin (300 nM-1 μM), FICZ (3-6 μM), ANI-7 (100-300 nM), BaP (100 nM-1 μM), b-NF (300 nM-1 μM). GFP signals dependent on AHR are labeled in the histograms (dark peaks: WT; gray peaks: KO or CKO).

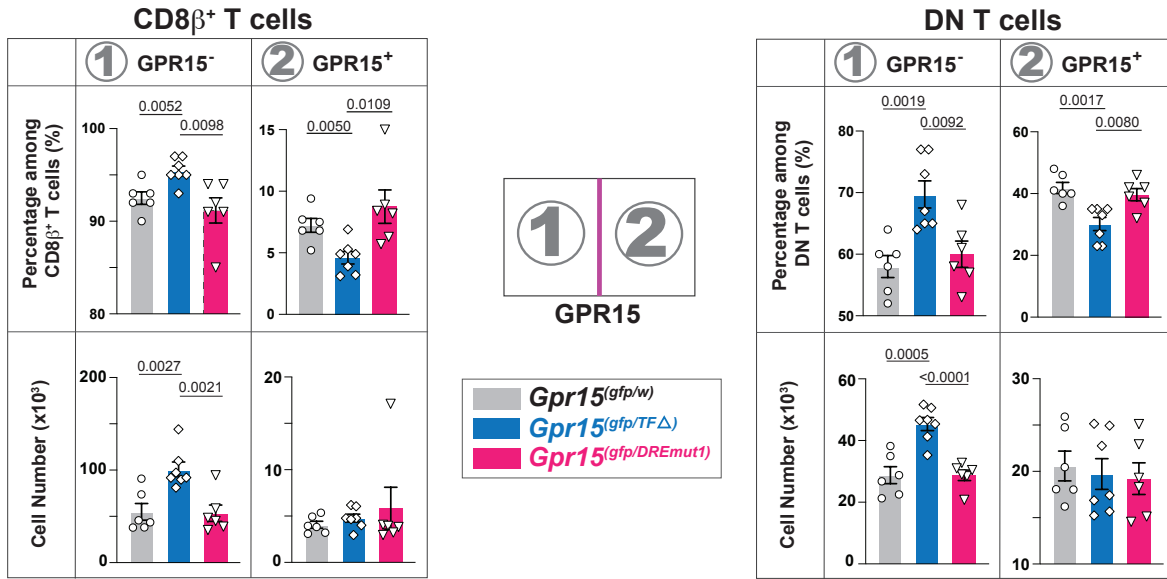

**Supplementary Fig. 6 GPR15 expression in CD8 $\beta^+$  T cells and DN T cells in the LILP is affected by the binding of the transcriptional factors, other than AhR.**

8-12-week-old *Gpr15(gfp/w)* (n=6), *Gpr15(gfp/TF $\Delta$ )* (n=7), and *Gpr15(gfp/DREmut1)* (n=6) mice in C57BL/6 background. Cell numbers and population percentages are shown. Representative of two independent experiments. Data are presented as mean values  $\pm$  SEM. Each data point represents the result from one mouse, and p values were calculated by two-sided student's t-test. Source data are provided as a Source Data file.

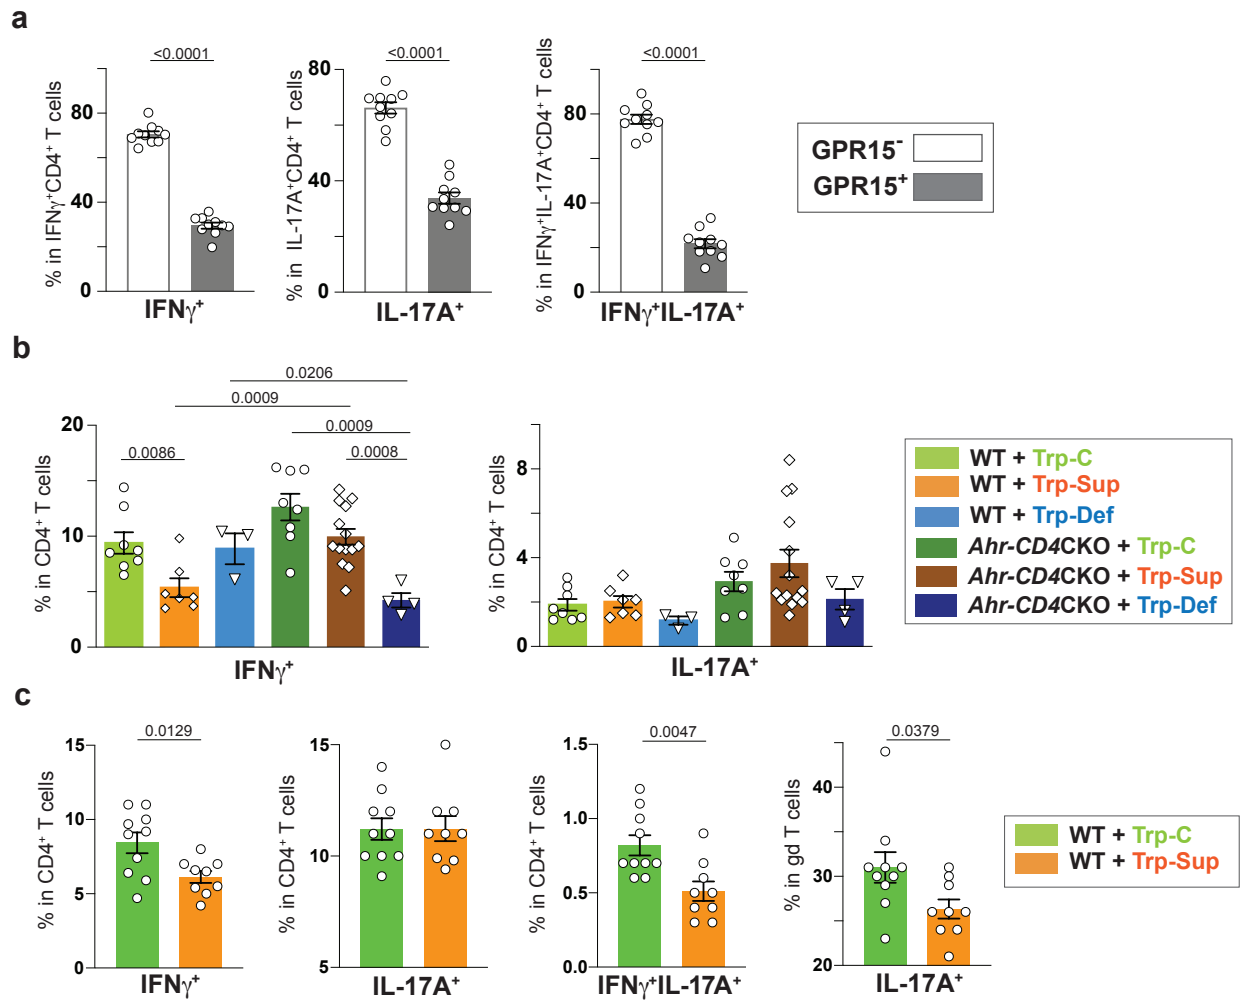

**Supplementary Fig. 7 The decrease of IFN $\gamma$ <sup>+</sup> cells and IFN $\gamma$ <sup>+</sup>IL-17A<sup>+</sup> accompanies dietary L-Trp-mediated increase of GPR15<sup>+</sup> Tregs in the large intestine.**

**a-c.** Murine CD4<sup>+</sup> T cells from LILP were stimulated in the presence of GolgiStop, PMA, and Ionomycin for 3 hr and stained intracellularly for cytokines. **a.** 8-12-week-old wild-type C57BL/6 mice (n=10) at steady state with Taconic microbiota were used. The percentages of GPR15<sup>+</sup> and GPR15<sup>-</sup> cells among cytokine-producing cells were shown. Representative of two independent experiments. **b.** 8-14-week-old mice in C57BL/6 background with TJU microbiota 1 (SFB-free, Fig. 3b) were fed three different types of elementary diets *ad libitum* for three weeks as shown in Fig. 1c-d. Cells from WT (*Ahr*<sup>(fl/fl)</sup>*Gpr15*<sup>(gfp/+)</sup>*Foxp3*<sup>mrfp</sup>) and *Ahr-CD4CKO* mice (*Cd4*<sup>Cre</sup>*Ahr*<sup>(fl/fl)</sup>*Gpr15*<sup>(gfp/+)</sup>*Foxp3*<sup>mrfp</sup>) were compared. Number of mice used: WT with Trp-C (n=8), Trp-Sup (n=7), or Trp-Def (n=3), *Ahr-CD4CKO* with Trp-C (n=8), Trp-Sup (n=14), or Trp-Def (n=4). Combined results of three independent experiments. **c.** 8-12-week-old wild-type C57BL/6 mice with Taconic microbiota were fed with Trp-C (n=10) or Trp-Sup (n=9) for 2 weeks and analyzed. Representative of two independent experiments. Data are presented as mean values +/- SEM (**a-c**). Each data point represents the result from one mouse, and p values were calculated by two-sided student's t-test (**a-c**). Source data are provided as a Source Data file (**a-c**).



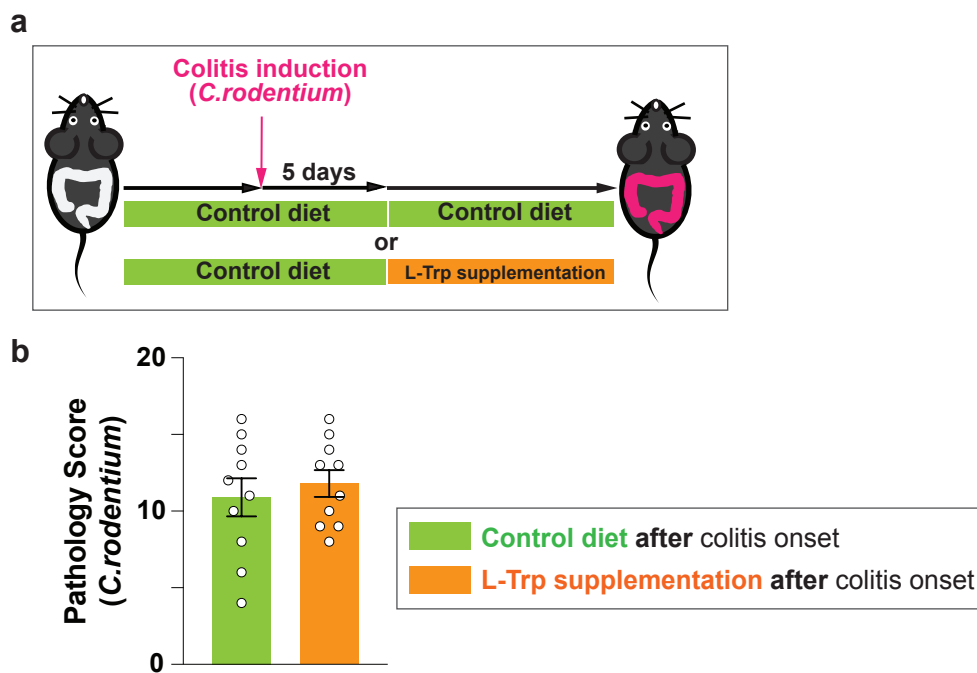

**Supplementary Fig. 8 L-Trp supplementation after colitis onset does not reduce the severity of colitis. a.** Experimental plan for the treatment of colitis. **b.** Pathology scores of the large intestine of 8-12-week-old wild-type C57BL/6 mice. Representative of two independent experiments. Number of mice used: WT with Control diet (n=10), WT with Trp-Sup (n=10). Data are presented as mean values  $\pm$  SEM. Each data point represents the result from one mouse. Source data are provided as a Source Data file (**b**).

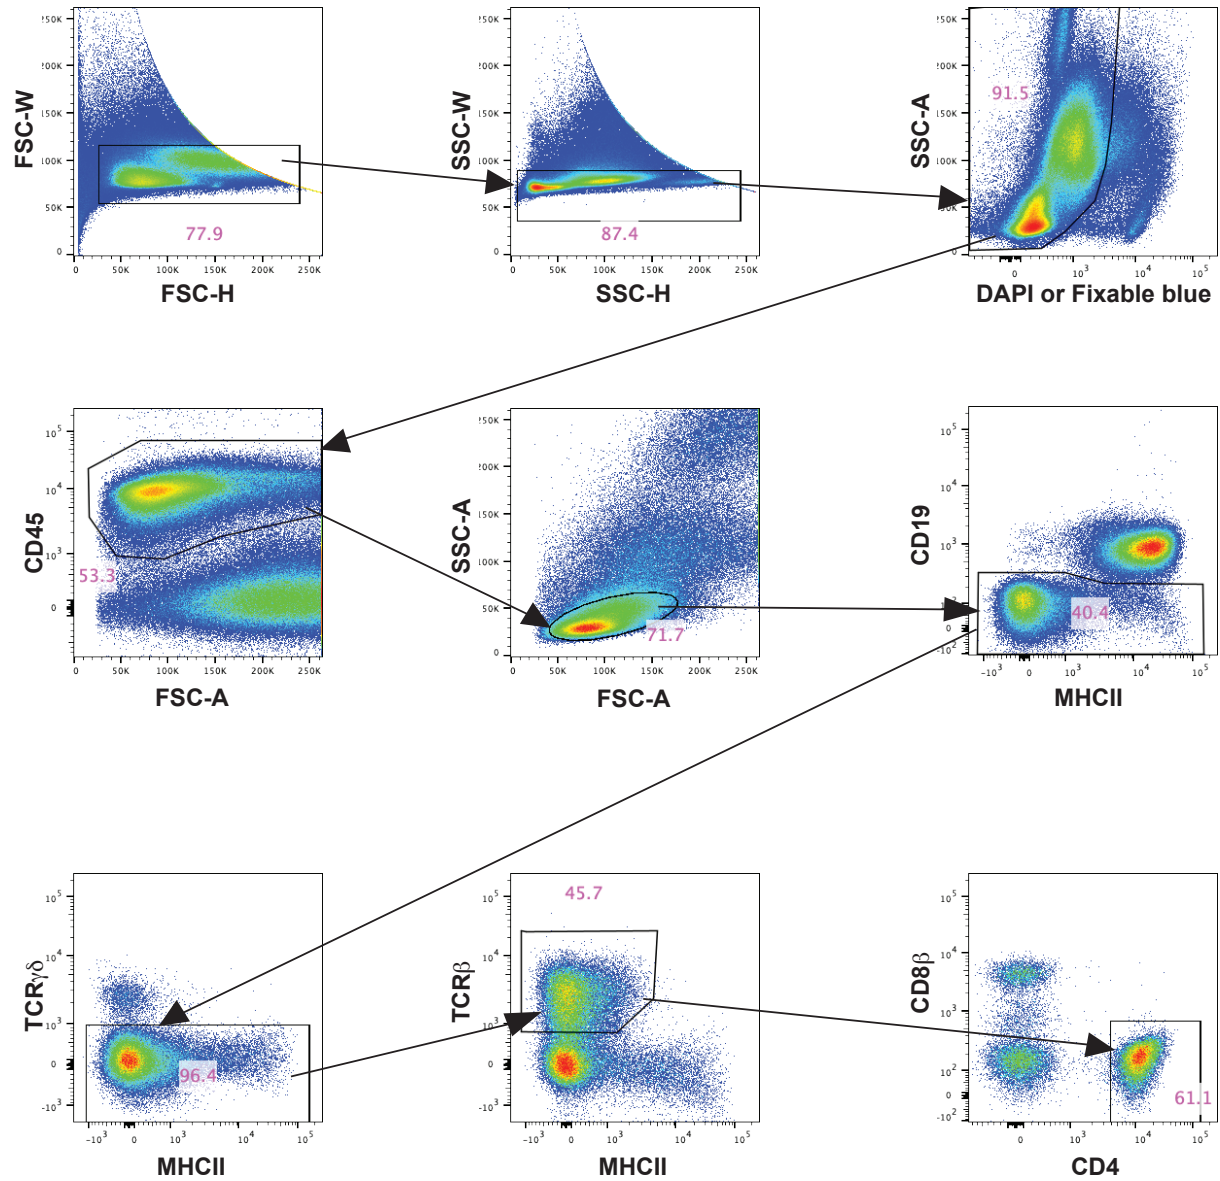

**Supplementary Fig. 9 Gating strategy for CD4<sup>+</sup> T cells.** DAPI or Fixable blue were used to exclude dead cells from the analysis.

**Supplementary Table 1. Composition of each elementary diet.**

The total nitrogen intake of mice remained the same across different diets by adjusting the amount of non-essential amino acids.

| <b>Formula (g/kg)</b>                              | <b>Trp-C<br/>(TD.07788)</b> | <b>Trp-Sup<br/>(TD. 170745)</b> | <b>Trp-Def<br/>(TD. 08467)</b> | <b>Trp-Lo<br/>(TD. 200535)</b> |
|----------------------------------------------------|-----------------------------|---------------------------------|--------------------------------|--------------------------------|
| L-Alanine                                          | 3.5                         | 3.5                             | 3.5                            | 3.5                            |
| L-Arginine HCl                                     | 12.1                        | 12.1                            | 12.1                           | 12.1                           |
| L-Asparagine                                       | 6.0                         | 6.0                             | 6.0                            | 6.0                            |
| L-Aspartic Acid                                    | 3.5                         | 3.5                             | 3.5                            | 3.5                            |
| L-Cystine                                          | 3.5                         | 3.5                             | 3.5                            | 3.5                            |
| <b>L-Glutamic Acid</b>                             | <b>40.0</b>                 | <b>24.5</b>                     | <b>41.8</b>                    | <b>42.33</b>                   |
| Glycine                                            | 23.3                        | 23.3                            | 23.3                           | 23.3                           |
| L-Histidine HCl, monohydrate                       | 4.5                         | 4.5                             | 4.5                            | 4.5                            |
| L-Isoleucine                                       | 8.2                         | 8.2                             | 8.2                            | 8.2                            |
| L-Leucine                                          | 11.1                        | 11.1                            | 11.1                           | 11.1                           |
| L-Lysine HCl                                       | 18.0                        | 18.0                            | 18.0                           | 18.0                           |
| L-Methionine                                       | 8.6                         | 8.6                             | 8.6                            | 8.6                            |
| L-Phenylalanine                                    | 7.5                         | 7.5                             | 7.5                            | 7.5                            |
| L-Proline                                          | 3.5                         | 3.5                             | 3.5                            | 3.5                            |
| L-Serine                                           | 3.5                         | 3.5                             | 3.5                            | 3.5                            |
| L-Threonine                                        | 8.2                         | 8.2                             | 8.2                            | 8.2                            |
| <b>L-Tryptophan</b>                                | <b>1.8</b>                  | <b>12.5</b>                     | <b>0</b>                       | <b>0.2</b>                     |
| L-Tyrosine                                         | 5.0                         | 5.0                             | 5.0                            | 5.0                            |
| L-Valine                                           | 8.2                         | 8.2                             | 8.2                            | 8.2                            |
| Sucrose                                            | 344.53                      | 349.23                          | 344.43                         | 343.72                         |
| Corn Starch                                        | 150.0                       | 150.0                           | 150.0                          | 150.0                          |
| Maltodextrin                                       | 150.0                       | 150.0                           | 150.0                          | 150.0                          |
| Soybean Oil                                        | 80.0                        | 80.0                            | 80.0                           | 80.0                           |
| Cellulose                                          | 30.0                        | 30.0                            | 30.0                           | 30.0                           |
| Mineral Mix, AIN-93M-MX<br>(94049)                 | 35.0                        | 35.0                            | 35.0                           | 35.0                           |
| Calcium Phosphate,<br>monobasic, monohydrate       | 8.2                         | 8.2                             | 8.2                            | 8.2                            |
| Vitamin Mix, AIN-93-VX<br>(94047)                  | 19.5                        | 19.5                            | 19.5                           | 19.5                           |
| Choline Bitartrate                                 | 2.75                        | 2.75                            | 2.75                           | 2.75                           |
| TBHQ, antioxidant                                  | 0.02                        | 0.02                            | 0.02                           | 0.02                           |
| Food color                                         |                             | 0.1                             | 0.1                            | 0.1                            |
| <b>Selected Nutrient Information (% by weight)</b> |                             |                                 |                                |                                |
| Protein                                            | 15.4                        | 15.4                            | 15.3                           | 15.4                           |
| CHO                                                | 64.8                        | 65.3                            | 64.8                           | 64.8                           |
| Fat                                                | 8                           | 8                               | 8                              | 8                              |

**Supplementary Table 2. Chemical compounds used for in vitro screening in Fig. 4a**

| SOURCE          | CHEMICAL NAMES                                      | ABBREVIATION        | CAS#        | RANGE OF CONCENTRATION TESTED |
|-----------------|-----------------------------------------------------|---------------------|-------------|-------------------------------|
| Microbe-derived | 1-Hydroxyphanazine                                  | 1-HP                | 528-71-2    | 1 nM-10 µM                    |
|                 | 1,4-Dihydroxy-2-naphthoic acid                      | 1,4-DH-2-NA         | 31519-22-9  | 1 nM-1 µM                     |
|                 | 2,8-Quinolinediol                                   |                     | 15450-76-7  | 1 nM-100 µM                   |
|                 | 3-Methylindole                                      | 3M-indole           | 83-34-1     | 1 nM-100 µM                   |
|                 | Indole-3-acetaldehyde                               | I3-acetAld          | 20095-27-6  | 1 nM-10 µM                    |
|                 | Indole-3-acrylic acid                               | I3-acrylA           | 1204-06-4   | 1 nM-100 µM                   |
|                 | Indole-3-carboxaldehyde                             | I3-caAld            | 487-89-8    | 1 nM-100 µM                   |
|                 | 3-Indolelactic acid                                 | I3-LA               | 832-97-3    | 1 nM-1 mM                     |
|                 | Indole-3-propionic acid                             | I3-PA               | 830-96-6    | 1 nM-1 mM                     |
|                 | Indole-3-pyruvic acid                               | I3-PYA              | 392-12-1    | 1 nM-100 µM                   |
|                 | Indirubin                                           |                     | 906748-38-7 | 1 nM-10 µM                    |
|                 | Indole                                              |                     | 120-72-9    | 1 nM-100 µM                   |
|                 | Indoxyl sulfate                                     | I3-S                | 2642-37-7   | 1 nM-100 µM                   |
|                 | Pyocyanin                                           |                     | 85-66-5     | 1 nM-1 µM                     |
| Plant-derived   | 3,3'-diindolylmethane                               |                     | 1968-05-4   | 1 nM-10 µM                    |
|                 | Astaxanthin                                         |                     | 472-61-7    | 1 nM-10 µM                    |
|                 | Benzothiazole                                       |                     | 95-16-9     | 1 nM-100 µM                   |
|                 | Biochanin A                                         |                     | 491-80-5    | 1 nM-10 µM                    |
|                 | Curcumin                                            |                     | 458-37-7    | 1 nM-1 µM                     |
|                 | Diosmin                                             |                     | 520-27-4    | 1 nM-100 µM                   |
|                 | Indole-3-acetic acid                                | I3-acetA            | 6505-45-9   | 1 nM-100 µM                   |
|                 | Indole-3-acetamide                                  | I3-AM               | 879-37-8    | 1 nM-100 µM                   |
|                 | Indole-3-acetonitrile                               | I3-ACN              | 771-51-7    | 1 nM-100 µM                   |
|                 | Indole-3-carbinol                                   | I3-CBL              | 700-06-1    | 1 nM-100 µM                   |
|                 | Indigo                                              |                     | 482-89-3    | 1 nM-100 µM                   |
|                 | Myricetin                                           |                     | 529-44-2    | 1 nM-100 µM                   |
|                 | Norisoboldine                                       |                     | 23599-69-1  | 1 nM-10 µM                    |
|                 | Resveratrol                                         |                     | 501-36-0    | 1 nM-10 µM                    |
| Tryptamine      |                                                     | 61-54-1             | 1 nM-10 µM  |                               |
| Host-derived    | 3-Hydroxyanthranilic acid                           | 3H-anthranilic acid | 548-93-6    | 1 nM-10 µM                    |
|                 | 3-Hydroxy-DL-kynurenine                             | 3H-Kyn              | 484-78-6    | 1 nM-100 µM                   |
|                 | 5-hydroxy Indole-3-acetic Acid                      | 5-HIAA              | 54-16-0     | 10 nM-100 µM                  |
|                 | 5-Hydroxy-L-Tryptophan                              | 5-HTP               | 4350-09-8   | 10 nM-100 µM                  |
|                 | 5S,6R-dihydroxy-7E,9E,11Z,14Z-eicosatetraenoic acid | 5(S),6(R)-DiHETE    | 82948-88-7  | 1 nM-100 µM                   |
|                 | Anthranilic acid                                    |                     | 118-92-3    | 1 nM-100 µM                   |
|                 | Bilirubin                                           |                     | 635-65-4    | 1 nM-10 µM                    |

|               |                                                                   |           |             |              |
|---------------|-------------------------------------------------------------------|-----------|-------------|--------------|
|               | Biliverdin                                                        |           |             | 1 nM-100 µM  |
|               | Cinnabarinic acid                                                 |           | 606-59-7    | 1 nM-100 µM  |
|               | 6-Fomylindolo(3,2-b)carbazole                                     | FICZ      | 172922-91-7 |              |
|               | 2-(1H-Indol-3-ylcarbonyl)-4-thiazolecarboxylic acid methyl ester  | ITE       | 448906-42-1 | 1 nM-100 µM  |
|               | Kynurenic acid                                                    |           | 492-27-3    | 1 nM-100 µM  |
|               | L-Kynurenine                                                      |           | 2922-83-0   | 1 nM-100 µM  |
|               | Melatonin                                                         |           |             | 10 nM-100 µM |
|               | Picolinic acid                                                    |           |             |              |
|               | Prostaglandin G2                                                  |           | 51982-36-6  | 1 nM-10 µM   |
|               | Quinolinic acid                                                   |           | 89-00-9     | 1 nM-100 µM  |
|               | Serotonin                                                         |           |             | 1 nM-100 µM  |
|               | Xanthurenic acid                                                  |           | 59-00-7     | 1 nM-100 µM  |
| Anthropogenic | 1,2-Naphthoquinone                                                |           | 524-42-5    | 1 nM-1 µM    |
|               | 1,4-Naphthoquinone                                                |           | 130-15-4    | 1 nM-1 µM    |
|               | 10-chloro-7H-benzimidazo[2,1-a]benzo[de]isoquinolin-7-one         | 10-CL-BBQ | 23982-76-5  | 1 nM-10 nM   |
|               | 7,12-Dimethylbenz[a]anthracene                                    | 7,12-DMBA | 57-97-6     | 1 nM-10 µM   |
|               | Alpha-naphthoflavone                                              | Alpha-NF  | 604-59-1    | 1 nM-10 µM   |
|               | (Z)-2-(3,4-dichlorophenyl)-3-(1H-pyrrol-2-yl)acrylonitrile        | ANI-7     | 931417-26-4 | 1 nM-10 µM   |
|               | Benzo[a]pyrene                                                    | BaP       | 50-32-8     | 1 nM-10 µM   |
|               | Beta-naphthoflavone                                               | Beta-NF   | 6051-87-2   | 1 nM-100 µM  |
|               | Leuflunomide                                                      |           | 75706-12-6  | 1 nM-10 µM   |
|               | Mesalamine                                                        |           | 89-57-6     | 1 nM-100 µM  |
|               | 1-allyl-3-(3,4-dimethoxyphenyl)-7-(trifluoromethyl)-1H-indazole   | SGA360    | 680611-86-3 | 1 nM-10 µM   |
|               | 7-Oxo-7H-benzimidazo[2,1-a]benz[de]isoquinoline-3-carboxylic acid | STO-609   |             | 1 nM-10 µM   |
|               | 2,3,7,8-tetrachlorodibenzo-p-dioxin                               | TCDD      | 1746-01-6   | 1 nM-100 nM  |
|               | 6,2,4-Trimethoxyflavone                                           | TMF       | 720675-90-1 | 1 nM-10 µM   |
